# Supplementary material
Source: PubMed Central journal article supplement (PMC3202038)
Supplement: NIHMS324952-supplement-1_si_001.pdf [file NIHMS324952-supplement-1_si_001.pdf]

## *Supporting Information*

# Characterization of poly(Sodium Styrene Sulfonate) Thin Films Grafted from Functionalized Titanium Surfaces

*Gilad Zorn<sup>‡</sup>, Joe E. Baio<sup>1</sup>, Tobias Weidner<sup>1</sup>, Veronique Migonney<sup>2</sup>, David G. Castner<sup>1\*</sup>.*

<sup>1</sup>National ESCA and Surface Analysis Center for Biomedical Problems

Departments of Chemical Engineering and Bioengineering

University of Washington, Seattle, WA 98195-1750, USA.

<sup>2</sup>Laboratory of Biomaterials and Specialty Polymers (LBPS/CSPBAT - UMR 7244), Institut Galilée,

Université Paris 13, 93430 Villetaneuse, France

<sup>‡</sup> Current address: General Electric Global Research, One Research Circle, Niskayuna NY, 12309

\* Corresponding Author: Phone 206-543-8094. E-mail: castner@nb.uw.edu

Table S1: High-resolution O1s and C1s XPS peak fitting results for evaporated Ti, MPS modified Ti and pNaSS grafted Ti. The peaks are shown in figure 3.

|     | BE    | Possible Species                                                  | fractional peak area  |                 |                      |
|-----|-------|-------------------------------------------------------------------|-----------------------|-----------------|----------------------|
|     |       |                                                                   | Evaporated Ti         | MPS modified Ti | pNaSS grafted Ti     |
| O1s | 530.2 | TiO <sub>2</sub>                                                  | 0.84                  | 0.67            | 0.59                 |
|     | 531.8 | Ti- <u>Q</u> -H<br>Ti- <u>Q</u> -Si<br>C= <u>Q</u><br>S= <u>Q</u> | 0.16                  | 0.23            | 0.32                 |
|     | 533.1 | C- <u>Q</u> -Si<br>C- <u>Q</u> -C=O                               | ---                   | 0.09            | 0.09                 |
| C1s | 285.0 | <u>C</u> -C; <u>C</u> -H                                          | Surface contamination | 0.66            | 0.88                 |
|     | 286.5 | <u>C</u> -O-C<br><u>C</u> -O-Si                                   |                       | 0.22            | 0.12                 |
|     | 288.9 | O- <u>C</u> =O                                                    |                       | 0.12            | < limit of detection |

Table S2: Negative secondary ion fragments detected in ToF-SIMS analysis of the evaporated titanium, MPS modified titanium and pNaSS grafted titanium surfaces.

| Ion                                                                                                                                                        | Mass    |      | Evaporated titanium | MPS modified titanium | pNaSS grafted titanium |
|------------------------------------------------------------------------------------------------------------------------------------------------------------|---------|------|---------------------|-----------------------|------------------------|
| TiO <sub>3</sub> H                                                                                                                                         | 96.942  | Ti   | 1.53                | 1.11                  | 0.61                   |
| TiO <sub>3</sub> H <sub>2</sub>                                                                                                                            | 97.956  |      | 0.54                | 0.29                  | 0.16                   |
| Ti <sub>2</sub> OH <sub>2</sub>                                                                                                                            | 113.918 |      | 0.09                | 0.04                  | 0.03                   |
| TiO <sub>4</sub> H <sub>2</sub>                                                                                                                            | 113.955 |      | 0.11                | 0.09                  | 0.06                   |
| Ti <sub>2</sub> OH <sub>3</sub>                                                                                                                            | 114.914 |      | 0.50                | 0.21                  | 0.04                   |
| TiO <sub>4</sub> H <sub>3</sub>                                                                                                                            | 114.960 |      | 0.15                | 0.08                  | 0.07                   |
| Ti <sub>2</sub> OH <sub>4</sub>                                                                                                                            | 115.927 |      | 0.23                | 0.09                  | 0.02                   |
| TiSiO <sub>3</sub> CH                                                                                                                                      | 136.941 | MPS  | ---                 | 0.4                   | 0.09                   |
| TiSiO <sub>3</sub> CH <sub>2</sub>                                                                                                                         | 137.940 |      |                     | 0.1                   | 0.04                   |
| SiOCH <sub>2</sub>                                                                                                                                         | 57.988  |      |                     | 0.05                  | 0.03                   |
| SiOCH <sub>3</sub>                                                                                                                                         | 58.999  |      |                     | 0.10                  | 0.05                   |
| SiO <sub>2</sub>                                                                                                                                           | 59.970  |      |                     | 1.30                  | 0.20                   |
| SiO <sub>2</sub> CH <sub>3</sub>                                                                                                                           | 74.998  |      |                     | 0.39                  | 0.18                   |
| SiO <sub>3</sub>                                                                                                                                           | 75.970  |      |                     | 0.67                  | 0.05                   |
| C <sub>3</sub> H <sub>5</sub> O                                                                                                                            | 57.038  |      |                     | 0.33                  | 0.02                   |
| C <sub>2</sub> H <sub>3</sub> O <sub>2</sub>                                                                                                               | 59.017  |      |                     | 0.36                  | 0.05                   |
| C <sub>4</sub> H <sub>5</sub> O <sub>2</sub>                                                                                                               | 85.038  |      |                     | 0.20                  | 0.02                   |
| SO <sub>2</sub>                                                                                                                                            | 63.967  | NaSS | ---                 | ---                   | 2.71                   |
| SO <sub>3</sub>                                                                                                                                            | 79.966  |      |                     |                       | 16.25                  |
| SO <sub>3</sub> H                                                                                                                                          | 80.974  |      |                     |                       | 7.52                   |
| C <sub>2</sub> HSO <sub>3</sub>                                                                                                                            | 104.968 |      |                     |                       | 0.40                   |
| C <sub>5</sub> H <sub>9</sub> SO                                                                                                                           | 117.039 |      |                     |                       | 0.26                   |
| C <sub>5</sub> H <sub>11</sub> SO                                                                                                                          | 119.055 |      |                     |                       | 0.61                   |
| C <sub>6</sub> H <sub>4</sub> SO <sub>3</sub>                                                                                                              | 156.004 |      |                     |                       | 1.16                   |
| C <sub>6</sub> H <sub>6</sub> O <sub>3</sub>                                                                                                               | 158.011 |      |                     |                       | 0.10                   |
| C <sub>7</sub> H <sub>6</sub> SO <sub>3</sub>                                                                                                              | 170.028 |      |                     |                       | 0.57                   |
| C <sub>6</sub> H <sub>6</sub> SO <sub>3</sub> Na                                                                                                           | 181.013 |      |                     |                       | 1.36                   |
| C <sub>8</sub> H <sub>6</sub> SO <sub>3</sub>                                                                                                              | 182.019 |      |                     |                       | 0.29                   |
| C <sub>8</sub> H <sub>7</sub> SO <sub>3</sub>                                                                                                              | 183.035 |      |                     |                       | 7.59                   |
| C <sub>8</sub> H <sub>8</sub> SO <sub>3</sub>                                                                                                              | 184.037 |      |                     |                       | 0.84                   |
| C <sub>8</sub> H <sub>9</sub> SO <sub>3</sub>                                                                                                              | 185.029 |      |                     |                       | 0.55                   |
| C <sub>8</sub> H <sub>10</sub> SO <sub>3</sub>                                                                                                             | 186.024 |      |                     |                       | 0.07                   |
| C <sub>7</sub> H <sub>7</sub> SO <sub>3</sub> Na                                                                                                           | 194.024 |      |                     |                       | 0.08                   |
| C <sub>12</sub> H <sub>3</sub> O <sub>3</sub>                                                                                                              | 195.008 |      |                     |                       | 0.51                   |
| C <sub>13</sub> H <sub>9</sub> O <sub>2</sub>                                                                                                              | 197.042 |      |                     |                       | 0.29                   |
| C <sub>13</sub> H <sub>11</sub> O <sub>2</sub>                                                                                                             | 199.024 |      |                     |                       | 0.24                   |
| C <sub>8</sub> H <sub>9</sub> SO <sub>3</sub> Na                                                                                                           | 208.036 |      |                     |                       | 0.04                   |
| C <sub>14</sub> H <sub>9</sub> O <sub>2</sub>                                                                                                              | 209.038 |      |                     |                       | 0.32                   |
| C <sub>8</sub> H <sub>10</sub> SO <sub>3</sub> -C <sub>4</sub> H <sub>5</sub> O <sub>2</sub>                                                               | 271.037 |      |                     |                       | 0.12                   |
| C <sub>8</sub> H <sub>10</sub> SO <sub>3</sub> -C <sub>2</sub> H <sub>3</sub> O <sub>2</sub> -C <sub>3</sub> H <sub>4</sub>                                | 285.069 |      |                     |                       | 0.10                   |
| C <sub>8</sub> H <sub>10</sub> SO <sub>3</sub> -C <sub>2</sub> H <sub>3</sub> O <sub>2</sub> -C <sub>3</sub> H <sub>6</sub>                                | 287.049 |      |                     |                       | 0.07                   |
| C <sub>15</sub> H <sub>11</sub> O <sub>6</sub> S <sub>2</sub>                                                                                              | 350.996 |      |                     |                       | 0.08                   |
| C <sub>15</sub> H <sub>12</sub> O <sub>6</sub> S <sub>2</sub>                                                                                              | 352.027 |      |                     |                       | 0.04                   |
| C <sub>15</sub> H <sub>13</sub> O <sub>6</sub> S <sub>2</sub>                                                                                              | 353.035 |      |                     |                       | 0.03                   |
| C <sub>8</sub> H <sub>10</sub> SO <sub>3</sub> -C <sub>8</sub> H <sub>4</sub> -C <sub>2</sub> H <sub>3</sub> O <sub>2</sub> -CH <sub>4</sub>               | 361.004 |      |                     |                       | 0.09                   |
| C <sub>8</sub> H <sub>10</sub> SO <sub>3</sub> -C <sub>8</sub> H <sub>4</sub> -C <sub>2</sub> H <sub>3</sub> O <sub>2</sub> -C <sub>2</sub> H <sub>4</sub> | 372.988 |      |                     |                       | 0.40                   |
| C <sub>8</sub> H <sub>10</sub> SO <sub>3</sub> -C <sub>8</sub> H <sub>4</sub> -C <sub>2</sub> H <sub>3</sub> O <sub>2</sub> -C <sub>3</sub> H <sub>6</sub> | 387.025 |      |                     |                       | 0.25                   |
| C <sub>4</sub> H <sub>6</sub> N-C <sub>8</sub> H <sub>10</sub> SO <sub>3</sub> -C <sub>4</sub> H <sub>5</sub> O <sub>2</sub>                               | 339.026 | AIBN | ---                 | ---                   | 0.02                   |
| C <sub>4</sub> H <sub>6</sub> N <sub>2</sub> -C <sub>8</sub> H <sub>10</sub> SO <sub>3</sub> -C <sub>4</sub> H <sub>5</sub> O <sub>2</sub>                 | 353.035 |      |                     |                       | 0.03                   |
| C <sub>8</sub> H <sub>12</sub> N <sub>4</sub> -C <sub>8</sub> H <sub>10</sub> SO <sub>3</sub> -C <sub>4</sub> H <sub>5</sub> O <sub>2</sub>                | 434.999 |      |                     |                       | 0.01                   |

Table S3: Positive secondary ion fragments detected in ToF-SIMS analysis of the evaporated titanium, MPS modified titanium and pNaSS grafted titanium surfaces.

| Ion                                           | Mass    |      | Evaporated titanium | MPS modified titanium | pNaSS grafted titanium |
|-----------------------------------------------|---------|------|---------------------|-----------------------|------------------------|
| Ti                                            | 47.945  | Ti   | 2.98                | 1.94                  | 0.36                   |
| TiH                                           | 48.953  |      | 1.73                | 0.92                  | 0.14                   |
| TiO                                           | 63.943  |      | 3.63                | 2.64                  | 0.36                   |
| TiOH                                          | 64.951  |      | 1.27                | 0.86                  | 0.12                   |
| TiO <sub>2</sub> H                            | 80.946  |      | 1.26                | 0.94                  | 0.23                   |
| TiO <sub>2</sub>                              | 81.956  |      | 0.73                | 0.46                  | 0.10                   |
| Ti <sub>2</sub> O <sub>2</sub>                | 127.881 |      | 0.27                | 0.15                  | 0.02                   |
| Ti <sub>2</sub> O <sub>3</sub>                | 143.871 |      | 0.79                | 0.49                  | 0.09                   |
| TiO <sub>2</sub> Si                           | 107.911 |      | MPS                 | ---                   | 0.19                   |
| Si                                            | 27.976  | 0.20 |                     |                       | 0.10                   |
| Na                                            | 22.990  | NaSS | ---                 | ---                   | 23.80                  |
| C <sub>3</sub> H <sub>6</sub> N               | 56.049  | AIBN | ---                 | ---                   | 0.25                   |
| C <sub>8</sub> H <sub>12</sub> N              | 122.100 |      |                     |                       | 0.04                   |
| C <sub>8</sub> H <sub>12</sub> N <sub>2</sub> | 136.119 |      |                     |                       | 0.04                   |
| C <sub>6</sub> H <sub>12</sub> N <sub>4</sub> | 140.102 |      |                     |                       | 0.013                  |
| C <sub>8</sub> H <sub>12</sub> N <sub>4</sub> | 164.104 |      |                     |                       | 0.02                   |
